# Supplementary material
Source: publisher site journal article supplement (https://www.dovepress.com/article/539531)
Supplement: Supplementary file 1 [file 539531%20Revised%20Supplementary%20Materials.docx]

**Supplementary Material 1. Search strategy for the included databases**

**Database: PubMed (n=505)**

| **No.** | **Search Strategy** | **Results** |
| --- | --- | --- |
| #1 | Infertility[MeSH] OR Infertility, Female[MeSH] OR Reproductive Techniques, Assisted[MeSH] OR infertil*[tiab] OR "Reproductive techniques"[tiab] OR "Fertilization in vitro"[tiab] OR "IVF"[tiab] OR "In Vitro Fertilization"[tiab] OR "Artificial Insemination"[tiab] OR "Assisted Reproductive Technology"[tiab] OR ART[tiab] | 366,993 |
| #2 | Social Stigma[MeSH] OR Discrimination[MeSH] OR Prejudice[MeSH] OR stigma[tiab] OR "self-stigma"[tiab] OR "internalized stigma"[tiab] OR "anticipated stigma"[tiab] OR "perceived stigma"[tiab] OR "psychosocial burden"[tiab] OR "social exclusion"[tiab] OR "stigmatization"[tiab] | 113,655 |
| #3 | "Qualitative Research"[MeSH] OR "Grounded Theory"[tiab] OR "Phenomenology"[tiab] OR "Narrative Analysis"[tiab] OR "Content Analysis"[tiab] OR "Qualitative study"[tiab] OR "Descriptive qualitative"[tiab] OR "Thematic Analysis"[tiab] OR "Interpretative Phenomenological Analysis"[tiab] | 224,451 |
| #4 | (#1) AND (#2) AND (#3) | 507 |
| #5 | #4  Limiters applied: Publication Date ≤ February 28, 2025 | 505 |

**Database: CINAHL Plus with Full Text (n= 201)**

| **No.** | **Search Strategy** | **Results** |
| --- | --- | --- |
| #1 | MH "Infertility" OR MH "Infertility, Female" OR MH "Reproductive Techniques, Assisted"  OR TI ("Infertile women" OR "Women with infertility" OR "IVF" OR "In Vitro Fertilization"  OR "Artificial Insemination" OR "Assisted Reproductive Technology" OR "ART")  OR AB ("Infertile women" OR "Women with infertility" OR "IVF" OR "In Vitro Fertilization"  OR "Artificial Insemination" OR "Assisted Reproductive Technology" OR "ART") | 57,030 |
| #2 | MH "Social Stigma" OR MH "Discrimination" OR MH "Prejudice"  OR TI ("Stigma" OR "Self-stigma" OR "Internalized stigma" OR "Psychosocial burden"  OR "Social exclusion" OR "Stigmatization")  OR AB ("Stigma" OR "Self-stigma" OR "Internalized stigma" OR "Psychosocial burden"  OR "Social exclusion" OR "Stigmatization") | 46,754 |
| #3 | MH "Qualitative Research" OR MH "Phenomenology" OR MH "Grounded Theory"  OR MH "Narrative Analysis" OR MH "Content Analysis"  OR TI ("Qualitative study" OR "Descriptive qualitative" OR "Phenomenology"  OR "Grounded Theory" OR "Narrative Analysis" OR "Content Analysis"  OR "Thematic Analysis" OR "Interpretative Phenomenological Analysis")  OR AB ("Qualitative study" OR "Descriptive qualitative" OR "Phenomenology"  OR "Grounded Theory" OR "Narrative Analysis" OR "Content Analysis"  OR "Thematic Analysis" OR "Interpretative Phenomenological Analysis") | 159,410 |
| #4 | (#1) AND (#2) AND (#3) | 202 |
| #5 | #4  Limiters applied: Publication Date ≤ February 28, 2025 | 201 |

**Database: JSTOR (n= 196)**

| **No.** | **Search Strategy** | **Results** |
| --- | --- | --- |
| S1 | "Infertile women" OR "Women with infertility" OR "IVF" | 13,130 |
| S2 | "Stigma" OR "Self-stigma" OR "Discrimination" | 831,041 |
| S3 | "Qualitative research" OR "Phenomenology" OR "Grounded theory" | 185,879 |
| S4 | (S1) AND (S2) AND (S3) | 196 |
| S5 | S4  Limiters applied: Publication Date ≤ February 28, 2025 | 196 |

**Database: ProQuest Central (n=63)**

| **No.** | **Search Strategy** | **Results** |
| --- | --- | --- |
| S1 | TI(Infertil* OR "Women with infertility" OR "Assisted Reproductive Technology" OR "IVF" OR "Artificial Insemination" OR "Fertilization in Vitro")  OR AB(Infertil* OR "Women with infertility" OR "Assisted Reproductive Technology" OR "IVF" OR "Artificial Insemination" OR "Fertilization in Vitro")  OR SU(Infertility, Female) | 107,926 |
| S2 | TI(Stigma OR "Self-stigma" OR "Internalized stigma" OR "Experienced stigma" OR "Anticipated stigma" OR "Perceived stigma" OR Discrimination OR "Social Exclusion" OR "Psychosocial burden" OR Prejudice)  OR AB(Stigma OR "Self-stigma" OR "Internalized stigma" OR "Experienced stigma" OR "Anticipated stigma" OR "Perceived stigma" OR Discrimination OR "Social Exclusion" OR "Psychosocial burden" OR Prejudice)  OR SU(Social Stigma) | 483,635 |
| S3 | TI("Qualitative Research" OR "Qualitative Study" OR "Phenomenology" OR "Grounded Theory" OR "Narrative Analysis" OR "Content Analysis" OR "Thematic Analysis" OR "Interpretative Phenomenological Analysis" OR "Ethnography")  OR AB("Qualitative Research" OR "Qualitative Study" OR "Phenomenology" OR "Grounded Theory" OR "Narrative Analysis" OR "Content Analysis" OR "Thematic Analysis" OR "Interpretative Phenomenological Analysis" OR "Ethnography")  OR SU(Qualitative Research) | 417,864 |
| S4 | (S1) AND (S2) AND (S3) | 63 |
| S5 | S4  Limiters applied: Publication Date ≤ February 28, 2025 | 63 |

**Database: Web of Science (n=301)**

| **No.** | **Search Strategy** | **Results** |
| --- | --- | --- |
| S1 | TS=("Infertile women" OR "Women with infertility" OR "Female Infertility" OR "IVF" OR "In Vitro Fertilization"  OR "Artificial Insemination" OR "Fertilization in vitro" OR "Reproductive Techniques" OR "Assisted Reproductive Technology" OR "ART") | 698,221 |
| S2 | TS=("Stigma" OR "Self-stigma" OR "Internalized stigma" OR "Experienced stigma" OR "Anticipated stigma"  OR "Perceived stigma" OR "Discrimination" OR "Social Exclusion" OR "Psychosocial burden" OR "Prejudice" OR "Stigmatization") | 255,140 |
| S3 | TS=("Qualitative Research" OR "Phenomenology" OR "Grounded Theory" OR "Narrative Analysis"  OR "Content Analysis" OR "Thematic Analysis" OR "Interpretative Phenomenological Analysis") | 254,161 |
| S4 | (S1) AND (S2) AND (S3) | 305 |
| S5 | S4  Limiters applied: Publication Date ≤ 2025 | 301 |

**Database: Ovid MEDILINE (n=423)**

| **No.** | **Search Strategy** | **Results** |
| --- | --- | --- |
| #1 | exp Infertility, Female/ OR exp Infertility/ OR exp Reproductive Techniques, Assisted/ OR (infertil* OR "reproductive techniques" OR "fertilization in vitro" OR IVF OR "in vitro fertilization" OR "artificial insemination" OR "assisted reproductive technology" OR ART).ti,ab. | 290,709 |
| #2 | exp Social Stigma/ OR exp Discrimination/ OR (stigma OR self-stigma OR internalized stigma OR "social stigma" OR discrimination OR prejudice OR "psychosocial burden" OR "social exclusion").ti,ab. | 172,646 |
| #3 | exp Qualitative Research/ OR exp Phenomenology/ OR exp Grounded Theory/ OR exp Ethnographic Research/ OR (qualitative study OR qualitative research OR qualitative methods OR qualitative design OR descriptive qualitative OR phenomenology OR grounded theory OR narrative analysis OR content analysis OR thematic analysis OR interpretative phenomenological analysis).ti,ab. | 196,250 |
| #4 | (#1) AND (#2) AND (#3) AND (#4) | 423 |
| #5 | #4  Limiters applied: Publication Date ≤ 2025 | 423 |

**Supplementary Material 2. The studies finally included in the synthesis**

A1. Adane TB, Berhanu KZ, Sewagegn AA. Ethiopian women experiencing infertility: Sociocultural challenges and coping strategies. *Cogent Soc Sci*. 2024;10(1).

A2. Annan-Frey L, Boateng EA, Lomotey A, Lartey C, Dzomeku V. Lived experiences and coping strategies of persons seeking infertility treatment in the Kumasi metropolis: A descriptive phenomenological study. *BMC Womens Health*. 2023;23(1):74.

A3. Asiimwe S, Osingada CP, Mbalinda SN, et al. Women’s experiences of living with involuntary childlessness in Uganda: A qualitative phenomenological study. *BMC Womens Health*. 2022;22(1):532

A4. Bawadi H, Al-Hamdan ZM, Clark CJ, Hall-Clifford R, Hamadneh JM, Al-Sharu EE. Infertile Jordanian women’s self-perception about societal violence: An interpretative phenomenological study. *Int J Womens Health*. 2024;16:593–603.

A5. Daibes MA, Safadi RR, Athamneh T, Anees IF, Constantino RE. 'Half a woman, half a man; that is how they make me feel’: A qualitative study of rural Jordanian women’s experience of infertility. *Cult Health Sex*. 2018;20(5):516–530.

A6. Dierickx S. ‘With the kanyaleng and the help of god, you don’t feel ashamed’: Women experiencing infertility in Casamance, Senegal. *Culture Health & Sexuality*. 2022;24(2):268–283

A7. Dierickx S, Rahbari L, Longman C, Jaiteh F, Coene G. ‘I am always crying on the inside’: A qualitative study on the implications of infertility on women’s lives in Urban Gambia. *Reprod Health*. 2018;15(1).

A8. Jiang L, Xiao L, Zhong Y. Stigma experience of female infertility patients in China: A phenomenological study. *Afr J Reprod Health*. 2025;29(1):38–45.

A9. Mashaah T, Gomo E, Maradzika JC, Madziyire MG, January J. Psychological, sociocultural, and coping experiences of women with infertility using traditional healthcare services in Harare urban, Zimbabwe: A qualitative study. *Afr J Reprod Health*. 2024;28(6):25–38.

A10. Naab F, Lawali Y, Donkor ES. ‘My mother in-law forced my husband to divorce me’: Experiences of women with infertility in Zamfara State of Nigeria. *PLOS One*. 2019;14(12).

A11. Nahar P, van der Geest S. How women in Bangladesh confront the stigma of childlessness: Agency, resilience, and resistance. *Med Anthropol Q*. 2014;28(3):381–398.

A12. Ofosu-Budu D, Hanninen V. Living as an infertile woman: The case of southern and northern Ghana. *Reprod Health*. 2020;17(1):69.

A13. Sharma S, Sharma R, Manani P, Prasad IV. Infertility among married women in Northern India: A qualitative study of coping strategies and social stigmas. *Int J Womens Health Reprod Sci*. 2024;12(1):33–41.

A14. Taebi M, Kariman N, Montazeri A, Alavi Majd HA. Infertility stigma: A qualitative study on feelings and experiences of infertile women. Int J Fertil Steril. 2021;15(3):189–196.

**Quality appraisal of included studies**

| Included studies | | 1 | 2 | 3 | 4 | 5 | 6 | 7 | 8 | 9 |
| --- | --- | --- | --- | --- | --- | --- | --- | --- | --- | --- |
| Adane et al. (2024) | | Y | Y | Y | Y | Y | Y | Y | Y | Y |
| Annan-Frey et al. (2023) | | Y | Y | Y | Y | Y | Y | Y | Y | Y |
| Asiimwe et al. (2022) | | Y | Y | C | C | Y | C | Y | Y | Y |
| Bawadi et al. (2024) | | Y | Y | Y | Y | Y | Y | Y | Y | Y |
| Daibes et al. (2017) | | Y | Y | Y | Y | Y | Y | Y | Y | Y |
| Dierickx (2022) | | Y | Y | Y | Y | Y | Y | Y | Y | Y |
| Dierickx et al. (2018) | | Y | Y | Y | Y | Y | Y | Y | Y | Y |
| Jiang et al. (2025) | | Y | Y | Y | Y | Y | C | Y | Y | Y |
| Mashaah et al. (2024) | | Y | Y | Y | Y | Y | Y | Y | Y | Y |
| Naab et al. (2019) | | Y | Y | Y | Y | Y | C | Y | Y | Y |
| Nahar et al. (2014) | | Y | Y | Y | Y | Y | C | C | C | Y |
| Ofosu-Budu & Hanninen (2020) | | Y | Y | Y | C | Y | C | Y | Y | Y |
| Sharma et al. (2023) | | Y | Y | Y | Y | Y | Y | Y | Y | Y |
| Taebi et al. (2021) | | Y | Y | Y | Y | Y | Y | Y | Y | Y |
|  | 1. Was there a clear statement of the aims of the research?  2. Is the qualitative methodology appropriate?  3. Was the research design appropriate to address the aims of the research?  4. Was the recruitment strategy appropriate to the aims of the research?  5. Was the data collected in a way that addressed the research issue?  6. Has the relationship between researcher and participants been adequately considered?  7. Have ethical issues been taken into consideration?  8. Was the data analysis sufficiently rigorous?  9. Is there a clear statement of findings?  10. How valuable is the research?  Y = Yes; C = Can’t Tell; N = No. | | | | | | | | | | |
